# Supplementary material for: Unimolecular decomposition of acetyl peroxy radical: a potential source of tropospheric ketene
Source: Royal Society of Chemistry journal article supplement (doi:10.1039/d0cp04590j), 2020-01-01
Supplement: d0cp04590j1.pdf [file d0cp04590j1.pdf]

**Supporting Information**

**Unimolecular Decomposition of Acetyl Peroxy Radical: A Potential Source for Tropospheric Ketene**

L. Sandhiya,<sup>\*a</sup> K. Senthilkumar<sup>\*b</sup>

<sup>a</sup>CSIR - National Institute of Science, Technology and Development Studies  
New Delhi-110060, India

<sup>b</sup>Department of Physics, Bharathiar University, Coimbatore – 641 046  
Tamil Nadu, India.

\*Corresponding authors E-mail: [sandhiya@nistads.res.in](mailto:sandhiya@nistads.res.in)  
[ksenthil@buc.edu.in](mailto:ksenthil@buc.edu.in)

**Computational Details:**

The geometries of the stationary points on the ground state potential energy surface of the reactions studied were optimized at UM06-2X/aug-cc-pVQZ level of theory. Harmonic vibrational frequency calculations were performed at the same level to verify the nature of the stationary points. The single point calculations on the UM06-2X/aug-cc-pVQZ optimized structures were carried out at UCCSD(T)/aug-cc-pVTZ and UCCSD(T)-F12/cc-pVTZ levels. The energetic calculated at UM06-2X/aug-cc-pVQZ level are in closer agreement with the UCCSD(T)/aug-cc-pVTZ//UM06-2X/aug-cc-pVQZ results. Hence, the results obtained at UCCSD(T)/aug-cc-pVTZ//UM06-2X/aug-cc-pVQZ level are discussed in the manuscript. The excited state properties of the minima along the PES of the reactions studied were calculated at EOM-CCSD/aug-cc-pVTZ level of theory. The calculations at UCCSD(T)-F12/cc-pVTZ level are performed using MOLPRO program package and all the other calculations are performed using GAUSSIAN 09 program package.

**Table S1a:** Energetics [in Hartrees] of the stationary points involved in the unimolecular dissociation of acetyl peroxy radical.

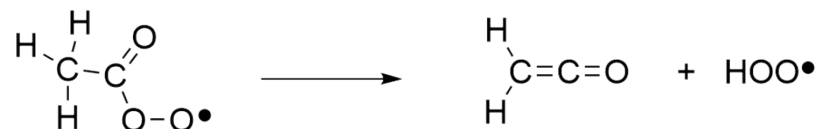

| Stationary points  | UM06-2X/aug-cc-pVQZ |             |             | UCCSD(T)-F12/cc-pVTZ |              |              | UCCSD(T)/aug-cc-pVTZ |              |              |
|--------------------|---------------------|-------------|-------------|----------------------|--------------|--------------|----------------------|--------------|--------------|
|                    | $E_{\text{Tot}}$    | $H_{298}$   | $G_{298}$   | $E_{\text{Tot}}$     | $H_{298}$    | $G_{298}$    | $E_{\text{Tot}}$     | $H_{298}$    | $G_{298}$    |
| R (R2 ts14 ircr)   | -303.573281         | -303.513978 | -303.549083 | -303.240495          | -303.181191  | -303.216296  | -303.146801          | -303.087498  | -303.122603  |
| TS1 (R2 ts14)      | -303.51109          | -303.458268 | -303.494435 | -303.17619           | -303.123368  | -303.159535  | -303.084244          | -303.031423  | -303.06759   |
| PC1 (R2 ts14 ircp) | -303.531613         | -303.474623 | -303.514365 | -303.194875          | -303.137884  | -303.177626  | -303.103444          | -303.046453  | -303.086195  |
| ketene             | -152.6070284        | -152.570697 | -152.598696 | -152.416574          | -152.3802428 | -152.4082418 | -152.3685192         | -152.3321878 | -152.3601868 |
| HO <sub>2</sub>    | -150.9155949        | -150.897150 | -150.923082 | -150.769160          | -150.7507156 | -150.7766476 | -150.7258743         | -150.7074294 | -150.7333614 |

**Table S1b:** Relative energies [in kcal/mol] of the stationary points involved in the unimolecular dissociation of acetyl peroxy radical.

| Stationary points        | UM06-2X/aug-cc-pVQZ     |                  |                  | UCCSD(T)-F12/cc-pVTZ    |                  |                  | UCCSD(T)/aug-cc-pVTZ    |                  |                  |
|--------------------------|-------------------------|------------------|------------------|-------------------------|------------------|------------------|-------------------------|------------------|------------------|
|                          | $\Delta E_{\text{Tot}}$ | $\Delta H_{298}$ | $\Delta G_{298}$ | $\Delta E_{\text{Tot}}$ | $\Delta H_{298}$ | $\Delta G_{298}$ | $\Delta E_{\text{Tot}}$ | $\Delta H_{298}$ | $\Delta G_{298}$ |
| R (R2 ts14 ircr)         | 0.0                     | 0.0              | 0.0              | 0.0                     | 0.0              | 0.0              | 0.0                     | 0.0              | 0.0              |
| TS1 (R2 ts14)            | +39.0                   | +34.9            | +34.3            | +40.3                   | +36.3            | +35.6            | +39.2                   | +35.2            | +34.5            |
| PC1 (R2 ts14 ircp)       | +26.2                   | +24.7            | +21.8            | +28.6                   | +27.2            | +24.3            | +27.2                   | +25.7            | +22.8            |
| Ketene + HO <sub>2</sub> | +31.8                   | +28.9            | +17.2            | +34.4                   | +31.5            | +19.7            | +32.9                   | +30.0            | +18.2            |

**Table S2a:** Energetics [in Hartrees] of the stationary points involved in the dissociation of acetyl peroxy radical in the presence of a water monomer.

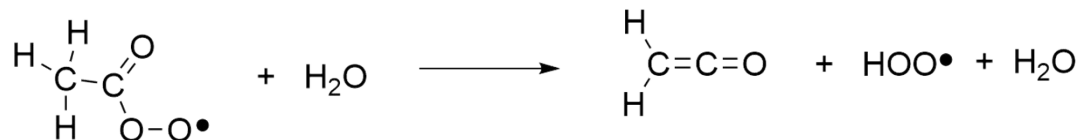

| Stationary points  | UM06-2X/aug-cc-pVQZ |                  |                  | UCCSD(T)-F12/cc-pVTZ |                  |                  | UCCSD(T)/aug-cc-pVTZ |                  |                  |
|--------------------|---------------------|------------------|------------------|----------------------|------------------|------------------|----------------------|------------------|------------------|
|                    | E <sub>Tot</sub>    | H <sub>298</sub> | G <sub>298</sub> | E <sub>Tot</sub>     | H <sub>298</sub> | G <sub>298</sub> | E <sub>Tot</sub>     | H <sub>298</sub> | G <sub>298</sub> |
| R                  | -303.573281         | -303.513978      | -303.549083      | -303.240495          | -303.181191      | -303.216296      | -303.146801          | -303.087498      | -303.122603      |
| H <sub>2</sub> O   | -76.4340463         | -76.408679       | -76.430745       | -76.3635701          | -76.3382028      | -76.3602688      | -76.3422881          | -76.3169208      | -76.3389868      |
| RC1 (R3 ts2 ircr)  | -380.015145         | -379.928102      | -379.972364      | -379.613045          | -379.526002      | -379.570264      | -379.4967858         | -379.409743      | -379.454005      |
| TS2 (R3 ts2)       | -379.948188         | -379.869381      | -379.908982      | -379.541543          | -379.462737      | -379.502338      | -379.425126          | -379.34632       | -379.385921      |
| PC1 (R3 ts2 ircp)  | -379.980463         | -379.895617      | -379.942949      | -379.575559          | -379.490713      | -379.538045      | -379.4604053         | -379.375559      | -379.422891      |
| Ketene             | -152.6070284        | -152.570697      | -152.598696      | -152.4165742         | -152.3802428     | -152.4082418     | -152.3685192         | -152.3321878     | -152.3601868     |
| HO <sub>2</sub>    | -150.9155949        | -150.897150      | -150.923082      | -150.7691605         | -150.7507156     | -150.7766476     | -150.7258743         | -150.7074294     | -150.7333614     |
| H <sub>2</sub> O   | -76.4340463         | -76.408679       | -76.430745       | -76.3635701          | -76.3382028      | -76.3602688      | -76.3422881          | -76.3169208      | -76.3389868      |
| Stepwise mechanism |                     |                  |                  |                      |                  |                  |                      |                  |                  |
| RC1a               | -380.0151128        | -379.928074      | -379.972293      |                      |                  |                  |                      |                  |                  |
| TS2a               | -379.9600387        | -379.878853      | -379.919914      |                      |                  |                  |                      |                  |                  |
| INT2a              | -379.9677872        | -379.881908      | -379.926633      |                      |                  |                  |                      |                  |                  |
| TS2b               | -379.9556736        | -379.875313      | -379.915847      |                      |                  |                  |                      |                  |                  |
| INT2b              | -380.0068822        | -379.920455      | -379.965035      |                      |                  |                  |                      |                  |                  |
| TS2c               | -379.9421574        | -379.859023      | -379.904181      |                      |                  |                  |                      |                  |                  |
| PC2a               | -379.9778812        | -379.893099      | -379.941015      |                      |                  |                  |                      |                  |                  |

**Table S2b:** Relative Energies [in kcal/mol] of the stationary points involved in the dissociation of acetyl peroxy radical in the presence of a water monomer.

| Stationary points                        | UM06-2X/aug-cc-pVQZ     |                  |                  | UCCSD(T)-F12/cc-pVTZ    |                  |                  | UCCSD(T)/aug-cc-pVTZ    |                  |                  |
|------------------------------------------|-------------------------|------------------|------------------|-------------------------|------------------|------------------|-------------------------|------------------|------------------|
|                                          | $\Delta E_{\text{Tot}}$ | $\Delta H_{298}$ | $\Delta G_{298}$ | $\Delta E_{\text{Tot}}$ | $\Delta H_{298}$ | $\Delta G_{298}$ | $\Delta E_{\text{Tot}}$ | $\Delta H_{298}$ | $\Delta G_{298}$ |
| R+H <sub>2</sub> O                       | 0.0                     | 0.0              | 0.0              | 0.0                     | 0.0              | 0.0              | 0.0                     | 0.0              | 0.0              |
| RC1 (R3 ts2 ircr)                        | -4.9                    | -3.4             | +4.7             | -5.6                    | -4.1             | +3.9             | -4.8                    | -3.3             | +4.7             |
| TS2 (R3 ts2)                             | +37.1                   | +33.4            | +44.4            | +39.2                   | +35.5            | +46.6            | +40.1                   | +36.4            | +47.5            |
| PC1 (R3 ts2 ircp)                        | +16.8                   | +16.9            | +23.1            | +17.8                   | +17.9            | +24.2            | +17.9                   | +18.1            | +24.3            |
| Ketene+HO <sub>2</sub> +H <sub>2</sub> O | +31.8                   | +28.9            | +17.1            | +34.4                   | +31.5            | +19.7            | +32.8                   | +30.0            | +18.2            |
| Stepwise mechanism                       |                         |                  |                  |                         |                  |                  |                         |                  |                  |
| RC1a                                     | -4.9                    | -3.4             | +4.7             |                         |                  |                  |                         |                  |                  |
| TS2a                                     | +29.7                   | +27.5            | +37.6            |                         |                  |                  |                         |                  |                  |
| INT2a                                    | +24.8                   | +25.6            | +33.4            |                         |                  |                  |                         |                  |                  |
| TS2b                                     | +32.4                   | +29.7            | +40.2            |                         |                  |                  |                         |                  |                  |
| INT2b                                    | +0.3                    | +1.4             | +9.3             |                         |                  |                  |                         |                  |                  |
| TS2c                                     | +40.9                   | +39.9            | +47.5            |                         |                  |                  |                         |                  |                  |
| PC2a                                     | +18.4                   | +18.5            | +24.3            |                         |                  |                  |                         |                  |                  |

**Table S3a:** Energetics [in Hartrees] of the stationary points involved in the dissociation of acetyl peroxy radical in the presence of a water dimer.

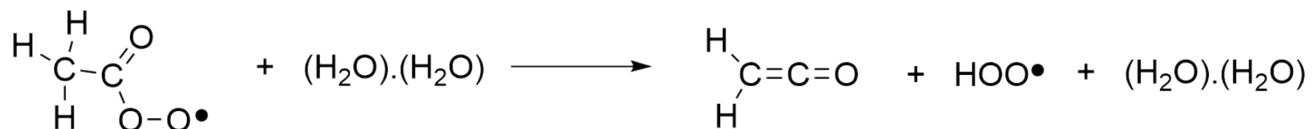

| Stationary points  | UM06-2X/aug-cc-pVQZ |             |             | UCCSD(T)-F12/cc-pVTZ |              |              | UCCSD(T)/aug-cc-pVTZ |              |              |
|--------------------|---------------------|-------------|-------------|----------------------|--------------|--------------|----------------------|--------------|--------------|
|                    | $E_{\text{Tot}}$    | $H_{298}$   | $G_{298}$   | $E_{\text{Tot}}$     | $H_{298}$    | $G_{298}$    | $E_{\text{Tot}}$     | $H_{298}$    | $G_{298}$    |
| R                  | -303.573281         | -303.513978 | -303.549083 | -303.240495          | -303.181191  | -303.216296  | -303.146801          | -303.087498  | -303.122603  |
| H <sub>2</sub> O   | -76.4340463         | -76.408679  | -76.430745  | -76.3635701          | -76.3382028  | -76.3602688  | -76.3422881          | -76.3169208  | -76.3389868  |
| RC2 (R4 ts21 ircr) | -456.439855         | -456.324943 | -456.375647 | -455.992413          | -455.877501  | -455.928205  | -455.8527165         | -455.737804  | -455.788508  |
| TS3                | -456.39089          | -456.284824 | -456.329594 | -455.913803          | -455.807737  | -455.852507  | -455.7736704         | -455.667605  | -455.712375  |
| PC3 (R4 ts21 ircp) | -456.406574         | -456.293846 | -456.348365 | -455.956566          | -455.843838  | -455.898357  | -455.8168593         | -455.704132  | -455.758651  |
| ketene             | -152.6070284        | -152.570697 | -152.598696 | -152.4165742         | -152.3802428 | -152.4082418 | -152.3685192         | -152.3321878 | -152.3601868 |
| HO <sub>2</sub>    | -150.9155949        | -150.897150 | -150.923082 | -150.7691605         | -150.7507156 | -150.7766476 | -150.7258743         | -150.7074294 | -150.7333614 |

**Table S3b:** Relative Energies [in kcal/mol] of the stationary points involved in the dissociation of acetyl peroxy radical in the presence of a water dimer.

| Stationary points                                         | UM06-2X/aug-cc-pVQZ     |                  |                  | UCCSD(T)-F12/cc-pVTZ    |                  |                  | UCCSD(T)/aug-cc-pVTZ    |                  |                  |
|-----------------------------------------------------------|-------------------------|------------------|------------------|-------------------------|------------------|------------------|-------------------------|------------------|------------------|
|                                                           | $\Delta E_{\text{Tot}}$ | $\Delta H_{298}$ | $\Delta G_{298}$ | $\Delta E_{\text{Tot}}$ | $\Delta H_{298}$ | $\Delta G_{298}$ | $\Delta E_{\text{Tot}}$ | $\Delta H_{298}$ | $\Delta G_{298}$ |
| R+H <sub>2</sub> O+H <sub>2</sub> O                       | 0.0                     | 0.0              | 0.0              | 0.0                     | 0.0              | 0.0              | 0.0                     | 0.0              | 0.0              |
| RC2 (R4 ts21 ircr)                                        | 0.9                     | +4.0             | +21.9            | -15.5                   | -12.5            | +5.4             | -13.4                   | -10.3            | +7.6             |
| TS3                                                       | +31.7                   | +29.2            | +50.8            | +33.8                   | +31.3            | +52.9            | +36.2                   | +33.7            | +55.3            |
| PC3 (R4 ts21 ircp)                                        | +21.8                   | +23.5            | +39.0            | +6.9                    | +8.6             | +24.2            | +9.1                    | +10.8            | +26.3            |
| Ketene+HO <sub>2</sub> +H <sub>2</sub> O+H <sub>2</sub> O | +31.8                   | +28.9            | +17.2            | +34.4                   | +31.5            | +19.7            | +32.9                   | +30.0            | +18.2            |

**Table S4:** Excited state properties of the minima involved in the present study

| Stationary points | EOM-CCSD/aug-cc-pVTZ<br>Electronic excitation (1 <sup>st</sup> excited state energy)<br>Excitation energy [eV] |
|-------------------|----------------------------------------------------------------------------------------------------------------|
| R                 | 0.8727                                                                                                         |
| PC1               | 1.1113                                                                                                         |
| RC1               | 0.8690                                                                                                         |
| PC2               | 1.0840                                                                                                         |
| RC2               | *                                                                                                              |
| PC3               | 1.0427                                                                                                         |

\* SCF not converged

**Structures of the stationary points optimized at UM06-2X/aug-cc-pVQZ level**

R

|   |              |              |              |
|---|--------------|--------------|--------------|
| 6 | 1.683592000  | -0.538368000 | -0.000016000 |
| 1 | 2.512488000  | 0.158833000  | -0.000327000 |
| 1 | 1.724753000  | -1.179015000 | 0.878562000  |
| 1 | 1.724465000  | -1.179525000 | -0.878234000 |
| 6 | 0.401170000  | 0.224450000  | 0.000000000  |
| 8 | 0.213365000  | 1.385290000  | 0.000006000  |
| 8 | -0.674020000 | -0.716845000 | 0.000027000  |
| 8 | -1.848130000 | -0.158043000 | -0.000020000 |

TS1

|   |              |              |              |
|---|--------------|--------------|--------------|
| 6 | 0.859190000  | 1.303163000  | -0.011973000 |
| 1 | 1.269189000  | 1.788023000  | -0.889912000 |
| 1 | -0.512929000 | 1.252277000  | -0.054413000 |
| 1 | 1.133226000  | 1.763070000  | 0.930965000  |
| 6 | 1.100933000  | -0.055658000 | -0.010248000 |
| 8 | 1.583989000  | -1.088003000 | -0.039713000 |
| 8 | -0.983146000 | -0.556487000 | 0.080139000  |
| 8 | -1.544225000 | 0.582978000  | -0.004889000 |

PC1

|   |              |              |              |
|---|--------------|--------------|--------------|
| 6 | 0.910830000  | 1.252613000  | 0.185303000  |
| 1 | 1.365238000  | 2.026378000  | -0.409829000 |
| 1 | -1.011083000 | 0.710429000  | -0.631466000 |
| 1 | 0.318736000  | 1.477593000  | 1.057482000  |
| 6 | 1.307434000  | 0.009760000  | 0.010864000  |
| 8 | 1.643607000  | -1.071030000 | -0.173216000 |
| 8 | -1.561997000 | -0.584211000 | 0.521611000  |



|   |              |             |              |
|---|--------------|-------------|--------------|
| 8 | -1.829419000 | 0.181662000 | -0.497543000 |
|---|--------------|-------------|--------------|

RC1

|   |              |              |              |
|---|--------------|--------------|--------------|
| 6 | 0.604473000  | 0.808010000  | 1.255935000  |
| 1 | 0.289480000  | 1.803020000  | 1.550367000  |
| 1 | 0.052605000  | 0.051651000  | 1.809243000  |
| 1 | 1.665270000  | 0.661588000  | 1.446714000  |
| 6 | 0.310127000  | 0.653793000  | -0.193953000 |
| 8 | -0.207021000 | 1.416365000  | -0.936738000 |
| 8 | 0.717383000  | -0.578590000 | -0.790081000 |
| 8 | 1.231295000  | -1.431364000 | 0.048605000  |
| 1 | -2.334514000 | -0.073665000 | -0.430129000 |
| 8 | -2.107001000 | -0.617564000 | 0.329408000  |
| 1 | -2.237692000 | -1.524192000 | 0.042365000  |

TS2

|   |              |              |              |
|---|--------------|--------------|--------------|
| 6 | -0.554348000 | 1.197392000  | -0.780595000 |
| 1 | -1.151240000 | 2.099627000  | -0.774867000 |
| 1 | 0.740418000  | 1.297966000  | 0.021243000  |
| 1 | -0.148159000 | 0.886133000  | -1.731926000 |
| 6 | -1.103475000 | 0.181729000  | -0.016957000 |
| 8 | -1.843713000 | -0.140827000 | 0.811595000  |
| 8 | -0.096194000 | -1.289894000 | -0.418396000 |
| 8 | 1.154556000  | -1.288960000 | -0.104710000 |
| 1 | 2.468985000  | 1.332669000  | 0.168369000  |
| 8 | 1.674368000  | 0.968822000  | 0.569881000  |
| 1 | 1.527345000  | -0.134026000 | 0.292964000  |

PC2

|   |              |             |              |
|---|--------------|-------------|--------------|
| 6 | 1.557807000  | 0.599610000 | 0.990446000  |
| 1 | 2.345513000  | 1.315754000 | 1.152090000  |
| 1 | -0.161663000 | 1.543498000 | -0.049775000 |

|   |              |              |              |
|---|--------------|--------------|--------------|
| 1 | 0.835816000  | 0.352411000  | 1.750201000  |
| 6 | 1.628314000  | -0.178727000 | -0.068402000 |
| 8 | 1.697230000  | -0.820600000 | -1.016894000 |
| 8 | -0.995615000 | -1.159051000 | 0.581076000  |
| 8 | -2.056519000 | -0.739801000 | -0.046861000 |
| 1 | -1.365457000 | 2.506537000  | -0.208769000 |
| 8 | -1.011576000 | 1.664933000  | -0.501181000 |
| 1 | -1.839093000 | 0.192666000  | -0.305127000 |

RC1a

|   |              |              |              |
|---|--------------|--------------|--------------|
| 6 | 0.596001000  | 0.809625000  | 1.256863000  |
| 1 | 0.046819000  | 0.051855000  | 1.808811000  |
| 1 | 1.655719000  | 0.669010000  | 1.452267000  |
| 1 | 0.275451000  | 1.802148000  | 1.549864000  |
| 6 | 0.308412000  | 0.653230000  | -0.194629000 |
| 8 | -0.207818000 | 1.413132000  | -0.938347000 |
| 8 | 0.723318000  | -0.576890000 | -0.786965000 |
| 8 | 1.237270000  | -1.425716000 | 0.050972000  |
| 1 | -2.238805000 | -1.527096000 | 0.036271000  |
| 8 | -2.106355000 | -0.622509000 | 0.325602000  |
| 1 | -2.336982000 | -0.077177000 | -0.430717000 |

TS2a

|   |              |              |              |
|---|--------------|--------------|--------------|
| 6 | 0.838706000  | 1.379366000  | 0.271613000  |
| 1 | -0.050351000 | 1.729310000  | -0.248929000 |
| 1 | 0.657118000  | 1.477043000  | 1.338562000  |
| 1 | 1.703530000  | 1.960538000  | -0.024823000 |
| 6 | 1.106751000  | -0.047812000 | -0.087952000 |
| 8 | 2.077943000  | -0.479758000 | -0.615381000 |
| 8 | 0.120176000  | -0.970431000 | 0.212579000  |
| 8 | -0.947601000 | -0.422500000 | 0.901577000  |
| 1 | -1.732913000 | -0.474012000 | 0.212055000  |
| 8 | -2.427663000 | 0.169817000  | -0.755071000 |

|   |              |             |              |
|---|--------------|-------------|--------------|
| 1 | -2.832959000 | 0.940762000 | -0.328464000 |
|---|--------------|-------------|--------------|

INT2a

|   |              |              |              |
|---|--------------|--------------|--------------|
| 6 | 0.391160000  | 1.327419000  | 0.345267000  |
| 1 | -0.467003000 | 1.453171000  | -0.311877000 |
| 1 | 0.015264000  | 1.221141000  | 1.359973000  |
| 1 | 1.051857000  | 2.182904000  | 0.273147000  |
| 6 | 1.177897000  | 0.114790000  | -0.046105000 |
| 8 | 2.317011000  | 0.092524000  | -0.385261000 |
| 8 | 0.534957000  | -1.099839000 | -0.010805000 |
| 8 | -0.799378000 | -0.997552000 | 0.441507000  |
| 1 | -1.297584000 | -1.254547000 | -0.345873000 |
| 8 | -2.776170000 | 0.410528000  | -0.454397000 |
| 1 | -2.928233000 | 0.498785000  | 0.501310000  |

TS2b

|   |              |              |              |
|---|--------------|--------------|--------------|
| 6 | 0.067028000  | -0.974306000 | 0.841754000  |
| 1 | 1.074548000  | -1.065507000 | 0.197709000  |
| 1 | 0.364008000  | -0.461854000 | 1.749073000  |
| 1 | -0.275824000 | -1.988465000 | 1.004452000  |
| 6 | -0.922559000 | -0.229521000 | 0.020025000  |
| 8 | -1.942084000 | -0.661400000 | -0.412790000 |
| 8 | -0.632740000 | 1.075779000  | -0.302253000 |
| 8 | 0.608528000  | 1.494291000  | 0.240266000  |
| 1 | 0.378526000  | 2.379568000  | 0.544210000  |
| 8 | 2.154026000  | -0.865146000 | -0.549166000 |
| 1 | 2.116729000  | 0.105300000  | -0.568625000 |

INT2b

|   |              |              |             |
|---|--------------|--------------|-------------|
| 6 | -1.718994000 | 0.920212000  | 0.582270000 |
| 1 | 2.031366000  | -1.109967000 | 0.148585000 |
| 1 | -1.264877000 | 1.891524000  | 0.535351000 |

|   |              |              |              |
|---|--------------|--------------|--------------|
| 1 | -2.653884000 | 0.759876000  | 1.090382000  |
| 6 | -1.140944000 | -0.240021000 | -0.044004000 |
| 8 | -1.642478000 | -1.334234000 | -0.055246000 |
| 8 | 0.057174000  | -0.118869000 | -0.701994000 |
| 8 | 0.622692000  | 1.173306000  | -0.583036000 |
| 1 | 1.474943000  | 0.931943000  | -0.173074000 |
| 8 | 2.575177000  | -0.393512000 | 0.491052000  |
| 1 | 3.478358000  | -0.598498000 | 0.243783000  |

TS2c

|   |              |              |              |
|---|--------------|--------------|--------------|
| 6 | -0.876866000 | -0.541462000 | 1.302225000  |
| 1 | 0.552607000  | 2.307746000  | -0.559598000 |
| 1 | 0.083036000  | -0.358863000 | 1.747025000  |
| 1 | -1.636139000 | -1.137593000 | 1.781720000  |
| 6 | -1.115158000 | -0.124835000 | 0.035332000  |
| 8 | -1.706154000 | 0.282100000  | -0.863912000 |
| 8 | 0.446421000  | -0.952988000 | -0.722568000 |
| 8 | 1.649002000  | -0.786311000 | -0.083707000 |
| 1 | 1.943773000  | -1.685077000 | 0.104891000  |
| 8 | 0.806708000  | 1.912953000  | 0.276595000  |
| 1 | 1.441054000  | 1.225537000  | 0.049360000  |

PC2a

|   |              |              |              |
|---|--------------|--------------|--------------|
| 6 | -0.897186000 | -0.856275000 | 1.059927000  |
| 1 | -0.175092000 | 2.740813000  | -0.013110000 |
| 1 | -0.536787000 | -0.083257000 | 1.719070000  |
| 1 | -1.069331000 | -1.866270000 | 1.395282000  |
| 6 | -1.505377000 | -0.469136000 | -0.046666000 |
| 8 | -2.014079000 | -0.191293000 | -1.034086000 |
| 8 | 2.104514000  | 0.202542000  | -0.392043000 |
| 8 | 1.837099000  | -1.047163000 | -0.154293000 |
| 1 | 0.913580000  | -1.064127000 | 0.210184000  |
| 8 | -0.106609000 | 1.878147000  | 0.397779000  |

|   |             |             |             |
|---|-------------|-------------|-------------|
| 1 | 0.715613000 | 1.487446000 | 0.070147000 |
|---|-------------|-------------|-------------|

RC2

|   |              |              |              |
|---|--------------|--------------|--------------|
| 6 | 1.712198000  | -0.063249000 | 1.167675000  |
| 1 | 2.623147000  | 0.516870000  | 1.267786000  |
| 1 | 0.903740000  | 0.389820000  | 1.736932000  |
| 1 | 1.858137000  | -1.081337000 | 1.521302000  |
| 6 | 1.337396000  | -0.059023000 | -0.270857000 |
| 8 | 1.841513000  | 0.490642000  | -1.184386000 |
| 8 | 0.199093000  | -0.874122000 | -0.623499000 |
| 8 | -0.381272000 | -1.442803000 | 0.388823000  |
| 1 | -2.327719000 | -0.898683000 | -0.146405000 |
| 1 | -3.651928000 | -0.231983000 | 0.267037000  |
| 8 | -2.845409000 | -0.089435000 | -0.232396000 |
| 1 | -1.555811000 | 1.226617000  | 0.186155000  |
| 8 | -0.751496000 | 1.720678000  | 0.410434000  |
| 1 | -0.646563000 | 2.372652000  | -0.285522000 |

TS3

|   |              |              |              |
|---|--------------|--------------|--------------|
| 6 | 1.157000000  | 0.894262000  | 0.974327000  |
| 1 | 1.842031000  | 1.679629000  | 1.258026000  |
| 1 | -0.230078000 | 1.394860000  | 0.113868000  |
| 1 | 0.568195000  | 0.420812000  | 1.743564000  |
| 6 | 1.615503000  | 0.089094000  | -0.031518000 |
| 8 | 2.346852000  | -0.095878000 | -0.917309000 |
| 8 | 0.284746000  | -1.145904000 | -0.223582000 |
| 8 | -0.529746000 | -1.302390000 | 0.762504000  |
| 1 | -1.755081000 | -1.038581000 | 0.117360000  |
| 1 | -3.298141000 | -0.425659000 | 0.082195000  |
| 8 | -2.463913000 | -0.431063000 | -0.393315000 |
| 1 | -1.911719000 | 0.596388000  | -0.379786000 |
| 8 | -1.152096000 | 1.585710000  | -0.365745000 |
| 1 | -1.514318000 | 2.401752000  | -0.012600000 |

PC3

|   |              |              |              |
|---|--------------|--------------|--------------|
| 6 | 1.668762000  | 0.049977000  | 1.399979000  |
| 1 | 2.186282000  | 0.619306000  | 2.154390000  |
| 1 | 0.094913000  | 1.689950000  | 0.309650000  |
| 1 | 0.850741000  | -0.610793000 | 1.637742000  |
| 6 | 2.159983000  | 0.020047000  | 0.183522000  |
| 8 | 2.581887000  | 0.030939000  | -0.887925000 |
| 8 | -0.316949000 | -1.127729000 | -0.701158000 |
| 8 | -1.200359000 | -1.616322000 | 0.125765000  |
| 1 | -1.919024000 | -0.914790000 | 0.191170000  |
| 1 | -3.415710000 | 0.703446000  | 0.844576000  |
| 8 | -2.806748000 | 0.428931000  | 0.157106000  |
| 1 | -2.131339000 | 1.130535000  | 0.046194000  |
| 8 | -0.543237000 | 1.778367000  | -0.408861000 |
| 1 | -0.355090000 | 1.008712000  | -0.964141000 |

Ketene

|   |              |              |              |
|---|--------------|--------------|--------------|
| 6 | -1.203425000 | -0.000005000 | -0.000029000 |
| 1 | -1.727744000 | 0.939458000  | 0.000122000  |
| 1 | -1.727704000 | -0.939495000 | 0.000122000  |
| 6 | 0.103749000  | 0.000021000  | -0.000044000 |
| 8 | 1.256688000  | -0.000008000 | 0.000024000  |

HO<sub>2</sub>

|   |              |              |             |
|---|--------------|--------------|-------------|
| 1 | -0.879212000 | -0.865528000 | 0.000000000 |
| 8 | 0.054951000  | 0.706493000  | 0.000000000 |
| 8 | 0.054951000  | -0.598302000 | 0.000000000 |

H<sub>2</sub>O

|   |             |              |             |
|---|-------------|--------------|-------------|
| 1 | 0.761485000 | -0.465688000 | 0.000000000 |
|---|-------------|--------------|-------------|

|   |              |              |             |
|---|--------------|--------------|-------------|
| 8 | 0.000000000  | 0.116422000  | 0.000000000 |
| 1 | -0.761485000 | -0.465686000 | 0.000000000 |
